# Supplementary material
Source: PubMed Central journal article supplement (PMC1533978)
Supplement: plntcell_tpc.106.042937_1.pdf [file plntcell_tpc.106.042937_1.pdf]

At-AP3 RIENQTNROVTYSKRRNGLFKKANELTVLCDARVSIIMFSSSNKLHEIYISPNNTTKEIVDLYQTIISDVVWVATOYERMOENTKRKLLETNRNLRTOIKORL  
Hm-AP3 -----NGLFKKANELTVLCDAKVSIIMFSTTNKLHEIYISPSISTKELFDLYQTTMGIDLWSSHYERMOENLKKLKDVRNRLRMEIRORM  
Am-DEF RIENQTNROVTYSKRRNGLFKKANELTVLCDAKVSIIMISSTGKLEHEIYISPTATKQLFDQYQKAVGVDLWSSHYEKMOEHLKKLKEVNRNLRREIRORM  
Ph-DEF RIENQTNROVTYSKRRNGLFKKANELTVLCDAKVSIIMISSTGKLEHEIYISPSITTKQLFDLYQKTVGVDLWNSHYEKMOEHLKKLKEVNRNLRREIRORM  
Bu-DEF RIENQTNROVTYSKRRNGLFKKANELTVLCDAKVSIIMISSTGKLEHEIYISPSITTKQLFDLYQKTVGVDLWNSHYEQMOEQLRKLKDVRNRLRKEIRORM  
Sc-DEF1 RIENQTNROVTYSKRRNGLFKKANELTVLCDAKVSIIMISSTGKLEHEIYISPSITTKQLFDLYQKTVGVDLWNSHYEKMOEQLRKLKDVRNRLRREIRORM  
Sc-DEF2 RIENQTNROVTYSKRRNGLFKKANELTVLCDAKVSIIMISSTGKLEHEIYISPSITTKQLFDLYQKTVGVDLWNSHYEKMOEQLRKLKDVRNRLRREIRORM  
Ma-DEF RIENQTNROVTYSKRRNGLFKKANELTVLCDAKVSIIMISSTGKLEHEIYISPSITTKQLFDLYQKTVGVDLWNSHYEKMOEQLRKLKDVRNRLRREIRORM  
Ce-DEF RIENQTNROVTYSKRRNGLFKKANELTVLCDAKVSIIMISSTGKLEHEIYISPSITTKQLFDLYQKTVGVDLWNSHYEKMOEQLRKLKDVRNRLRREIRORM  
S1-AP3 KIENQTNROVTYSKRRNGLFKKANELTVLCDAKVSIIMISSTGKLEHEIYISPSITTKQLFDLYQKTVGVDLWNSHYEKMOEQLRKLKDVRNRLRREIRORM  
Sp-DEF KIENQTNROVTYSKRRNGLFKKANELTVLCDAKVSIIMISSTGKLEHEIYISPSITTKQLFDLYQKTVGVDLWNSHYEKMOEQLRKLKDVRNRLRREIRORM  
Ja-DEF RIENQTNROVTYSKRRNGLFKKANELTVLCDAKVSIIMISSTGKLEHEIYISPSITTKQLFDLYQKTVGVDLWNSHYEKMOEQLRKLKDVRNRLRREIRORM  
Sm-DEF RIENQTNROVTYSKRRNGLFKKANELTVLCDAKVSIIMISSTGKLEHEIYISPSITTKQLFDLYQKTVGVDLWNSHYEKMOEQLRKLKDVRNRLRREIRORM  
Ph-TM6 KIENSTNROVTYSKRRNGLFKKAKELTVLCDAKICLIMLSSTRKHEIYISPNNTTKKMDLYQRTLGVDLWNSHYEKMOENLNRKLKIDINNKLRREIRQRT  
Bu-TM6 KIENSTNROVTYSKRRNGLFKKAKELTVLCDAKICLIMLSSTRRHEIYISPNNTTKKMDLYQRTLGVDLWNSHYEKMOENLNRKLKIDINNKLRREIRQRT  
S1-tm6 KIENSTNROVTYSKRRNGLFKKAKELTVLCDAKISLIMLSSTRKHEIYISPNNTTKKMDLYQRTLGVDLWNSHYEKMOENLNRKLKIDINNKLRREIRQRT  
Sp-TM6 KIENATNROVTYSKRRNGLFKKAKELTVLCDAKISLIMLSSTRKHEIYISPNNTTKKMDLYQRTLGVDLWNSHYEKMOENLNRKLKIDINNKLRREIRQRT  
Ma-TM6 KIENSTNROVTYSKRRNGLFKKAKELTVLCDARISLIMLSSTRKHEIYISPNNTTKKMDLYQRTLGVDLWNSHYEKMOENLNRKLKIDINNKLRREIRQRT  
Ja-TM6 KIENSTNROVTYSKRRNGLFKKAKELTVLCDAKISLIMLSSTRKHEIYISPNNTTKKMDLYQRTLGVDLWNSHYEKMOENLNRKLKIDINNKLRREIRQRT  
Sm-TM6 KIENSTNROVTYSKRRNGLFKKAKELTVLCDAKISLIMLSSTRKHEIYISPNNTTKKMDLYQRTLGVDLWNSHYEKMOENLNRKLKIDINNKLRREIRQRT  
Sc-TM6 KIENSTNRHVITYSKRRNGLFKKAKELTVLCDAKISLIMLSSTRKHEIYISPNNTTKKMDLYQRTLGVDLWNSHYEKMOENLNRKLKIDINNKLRREIRQRT  
Ce-TM6 KIENSTNROVTYSKRRNGLFKKAKELTVLCDAKISLIMLSSTRKHEIYISPNNTTKKMDLYQRTLGVDLWNSHYEKMOENLNRKLKIDINNKLRREIRQRT  
Hm-TM6 -----NGIikkaQELTVLCDAKVSLIMISSTGKHEIYISPSITTKQIYDQYQKTLDIDLWSTHYERMOEHLRKLKEVNNKLRREIRQRL  
Gt-AP3-1 -----KKAQELTVLCDAKVSIIMISNSNCKHEIYISSTSTKSIYDQYQKASGIDLWSSHYEKMOESLRKLKIDVNRNLRREIRORM  
Sc-AP3 -----AGIMKKARELTVLDAEVSIMFSSSTGKSEYISPSATTKKIMIDYQRTLGVDLWNSHYEKMOENLNRKLKIDINNKLRREIRORM  
Mp-MADS7 RIENSTNROVTYSKRRGGIMKKAKELTVLDAQVSLIMFSSSTGKSEYISPSSTTKNIFDRYQOASGISLWNSHYERMOESHILKIKKEENNRREIRORI  
Lr-DEF KIENSTNROVTYSKRRGTGIKKATELTVLDAEVSLLMFSSSTGKSEYISPSSTDKKIFDRYQOASGISLWNSHYERMOESHILKIKKEENNRREIRORI  
Zm-SILKY1 RIENATNROVTYSKRRGTGIMKKARELTVLDAQVAIIMFSSSTGKSEYISPSSTDKKIFDRYQOASGISLWNSHYERMOESHILKIKKEENNRREIRORI  
Os-MADS16 RIKNATNROVTYSKRRGTGIMKKARELTVLDAQVAIIMFSSSTGKSEYISPSSTDKKIFDRYQOASGISLWNSHYERMOESHILKIKKEENNRREIRORI  
Amt-AP3-1 RIENPTNROVTYSKRRGGIikkaKELTVLDAEVSIMFSSSTGKSEYISPSSTTKKIYDQYQKTLVSETNLWSTHYEKMOEDLGNLKEESNRLRKLIRQKM  
Ph-GLO2 RIENSSNRQVTYSKRRNGIikkaKELTVLDAKVSIIIFASNGKMEIYISPSITTKQLFDLYQKTVGVDLWNSHYEKMOEQLRKLKDVRNRLRREIRORM  
At-PI RIENANRNVYTFSKRRNGLVKKAKEITVLCDAKVALIIFASNGKMEIYISPSITTKQLFDLYQKTVGVDLWNSHYEKMOEQLRKLKDVRNRLRREIRORM  
Ph-GLO1 RIENSSNRQVTYSKRRNGIikkaKELTVLDAKVSIIIFASNGKMEIYISPSITTKQLFDLYQKTVGVDLWNSHYEKMOEQLRKLKDVRNRLRREIRORM  
Am-GLO RIENSSNRQVTYSKRRNGIMKKAKEITVLCDAHVSIIIFASNGKMEIYISPSITTKQLFDLYQKTVGVDLWNSHYEKMOEQLRKLKDVRNRLRREIRORM

At-AP3 GEDLDELDIQELRLLEDEMNTFKLVRRERKFSVLQIETTKKNSQADIQKNLIIHELEIRAEDEPHYGLVNGGVDYDVLGYQEG-SRAYALRFHQ  
Hm-AP3 GESLNDLSWKDLRGLLEQEMDSSVKIIRERKRYRVLGNQIDTFRKKVNRNVEIHRYLIIHEFEVKEEDPHYGLVNGGVDYDVLGYQEG-PPRIVAFRLQ  
Am-DEF GESLNDLGYEQIVNLIEDMDNSLKLIRERKRYKVISNQIDTSKVVNRNVEIHRNLLLEFDARQEDP-YGLVQEGDYNSVLGFPNGGPRITLRLP  
Ph-DEF GESLNDLNYEQLEELMENVDNSLKLIRERKRYKVISNQIETFKKKVNRNVEIHRNLLLEFDARQEDP-YGLVQEGDYNSVLGFPNGGHRILALRLP  
Bu-DEF GESLNDLNYEQLEELMENVDNSLKLIRERKRYKVISNQIETCKKKVNRNVEIHRNLLLEFDARQEDP-YGLVQEGDYNSVLGFPNGGHRILALRLP  
Sc-DEF1 GESLNDLNYEQLEELMENVDNSLKLIRERKRYKVISNQIETFKKKVNRNVEIHRNLLLEFDAREEDP-YGLVQEGDYNSVLGFPNGGPRILALRLP  
Sc-DEF2 GESLNDLNYEQLEELMENVDNSLKLIRERKRYKVISNQIETFKKKVNRNVEIHRNLLLEFDAREEDP-YGLVQEGDYNSVLGFPNGGPRILALRLP  
Ma-DEF GESLNDLNYEQLEELMENVDNSLKLIRERKRYKVISNQIETFKKKVNRNVEIHRNLLLEFDARQEDP-YGLVQEGDYNSVLGFPNGGPRILALRLP  
Ce-DEF GESLNDLNYEQLEELMENVDNSLKLIRERKRYKVISNQIETFKKKVNRNVEIHRNLLLEFDARQEDP-YGLVQEGDYNSVLGFPNGGPRILALRLP  
S1-AP3 GESLNDLNYEQLEELMENVDNSLKLIRERKRYKVISNQIETFKKKVNRNVEIHRNLLLEFDARQEDP-YGLVQEGDYNSVLGFPNGGPRILALRLP  
Sp-DEF GESLNDLNYEQLEELMENVDNSLKLIRERKRYKVISNQIDTCKKKVNRNVEIHRNLLLEFDARQEDP-YGLVQEGDYNSVLGFPNGGPRILALRLP  
Ja-DEF GESLNDLNYEQLEELMENVDNSLKLIRERKRYKVISNQIETFKKKVNRNVEIHRNLLLEFDARQEDP-YGLVQEGDYNSVLGFPNGGPRILALRLP  
Sm-DEF GESLNDLNYEQLEELMENVDNSLKLIRERKRYKVISNQIETFKKKVNRNVEIHRNLLLEFDARQEDP-YGLVQEGDYNSVLGFPNGGPRILALRLP  
Ph-TM6 GEDMSGNLNQLCHLQGNVSDSLAEIRERKRYHVIKTQDTCRKKVNRNLEEQHGNLVLDLEAKCEDPKYGVVNEGHFNLSAMAFANGVHNLVAFRLQ  
Bu-TM6 GEDMSGNLNQLCHLQENVSDSLAEIRERKRYHVIKTQDTCRKKVNRNLEEQHGNLVLDLEAKCEDPKYGVVNEGHFNLSAMAFANGVHNLVAFRLQ  
S1-tm6 GEDMSGNLNQLCHLQENITSVAEIRERKRYHVIKTQDTCRKKVNRNLEEQHGNLVLDLEAKCEDPKYGVVNEGHFNLSAMAFANGVHNLVAFRLQ  
Sp-TM6 GEDMSGNLNQLCHLQENISKSVAEIRERKRYHVIKTQDTCRKKVNRNLEEQHGNLVLDLEAKCEDPKYGVVNEGHFNLSAMAFANGVHNLVAFRLQ  
Ma-TM6 GEDMSGNLNQLCHLQENITDLSAEIRERKRYHVIKTQDTCRKKVNRNLEEQHGNLVLDLEAKCEDPKYGVVNEGHFNLSAMAFANGVHNLVAFRLQ  
Ja-TM6 GEDMSGNLNQLCHLQENISDLSAEIRERKRYHVIKTQDTCRKKVNRNLEEQHGNLVLDLEAKCEDPKYGVVNEGHFNLSAMAFANGVHNLVAFRLQ  
Sm-TM6 GEDMSGNLNQLCHLQENISDLSAEIRERKRYHVIKTQDTCRKKVNRNLEEQHGNLVLDLEAKCEDPKYGVVNEGHFNLSAMAFANGVHNLVAFRLQ  
Sc-TM6 GEDMSGNLNQLCHLQENITSLAEIRERKRYHVIKTQDTCRKKVNRNLEEQHGNLVLDLEAKCEDPKYGVVNEGHFNLSAMAFANGVHNLVAFRLQ  
Ce-TM6 GEDMSGNLNQLCHLQENISDLSAEIRERKRYHVIKTQDTCRKKVNRNLEEQHGNLVLDLEAKCEDPKYGVVNEGHFNLSAMAFANGVHNLVAFRLQ  
Hm-TM6 GEDLNDLNLNELRDLEOKSAASTAVIRERKRYHVIKTQDTCRKKVNRNLEEQHGNLVLDLEAKCEDPKYGVVNEGHFNLSAMAFANGVHNLVAFRLQ  
Gt-AP3-1 GEDLDDLRFDQIVALKVKTISSITSIIRERKRYHVIKTQDTCRKKVNRNLEEQHGNLVLDLEAKCEDPKYGVVNEGHFNLSAMAFANGVHNLVAFRLQ  
Sc-AP3 GEDLDDLRFDQIVALKVKTISSITSIIRERKRYHVIKTQDTCRKKVNRNLEEQHGNLVLDLEAKCEDPKYGVVNEGHFNLSAMAFANGVHNLVAFRLQ  
Mp-MADS7 GEDLDELLEELRGLLEQNLESSIKVVRDRKYHVITQDTEYKVKLRSLRDEHKLIROLEGQAEANGAYGLVNGGVDYDVLGYQEG-SRAYALRFHQ  
Lr-DEF GEELDGLDIDKDLRGLLEQNLEDEALKLVRHRKRYHVITQDTEYKVKLRSLRDEHKLIROLEGQAEANGAYGLVNGGVDYDVLGYQEG-PPRIVAFRLQ  
Zm-SILKY1 GEDLDSLDFDELRLGLEQNVDAAALKEVRRHRKRYHVITQDTEYKVKLRSLRDEHKLIROLEGQAEANGAYGLVNGGVDYDVLGYQEG-PPRIVAFRLQ  
Os-MADS16 GEDLDLGLFDELRLGLEQNVDAAALKEVRRHRKRYHVITQDTEYKVKLRSLRDEHKLIROLEGQAEANGAYGLVNGGVDYDVLGYQEG-PPRIVAFRLQ  
Amt-AP3-1 GEDINELKYKELRDLEQNLEEWVKRIRDKKNHLVTQDTEYKVKLRSLRDEHKLIROLEGQAEANGAYGLVNGGVDYDVLGYQEG-PPRIVAFRLQ  
Ph-GLO2 GEDINSLNHKELMLVLEEGTLNGLSSISAKQSEILR-----MVRKNDQILEEEHKQLQYALHQKEMAAMGGM-TEEHQRDRD---YQQMPFALRVQF  
At-PI GEDIQSLNKLKMLVAEHAIEHGLDKVRDHQMEILI-----SKRRNBKMMAEQORLTFQLQQQEMATASARGMRRDDGQ-----FGYRVQF  
Ph-GLO1 GEDITSLNHRLEMLILEDALENGLTSIRNKQNEVLR-----MMRKKTSQMEEEQDQNLNCRQLEIATMNRMGIGEQORENH-----DQNHMPFAFRVQF  
Am-GLO GEDITTLNLYKELMLVEDALENGTSALKNKQMEFVR-----MMRKHNEVMEENQSLQFKLRQMHLDPMNDVMSQADHHHQNIADEAOMPFAFRVQF
